# Supplementary material for: Inhibitory Role of Notch1 in Calcific Aortic Valve Disease
Source: PubMed Central journal article supplement (PMC3218038; doi:10.1371/journal.pone.0027743), 2011-11-16
Supplement: pone.0027743.s006.pdf [file pone.0027743.s006.pdf]

**Supplementary Table. Gene expression changes with inhibition of Notch signaling in rat AVICs identified by Affymetrix microarray.**

| <u>Gene ID</u> | <u>Name</u>       | <u>Fold change</u> | <u>Gene ID</u> | <u>Name</u>       | <u>Fold change</u> |
|----------------|-------------------|--------------------|----------------|-------------------|--------------------|
| AY007690       | Aard              | -1.9               | BI276121       | Cilp2_predicted   | -6.9               |
| NM_013040      | Abcc9             | 2.1                | AA957183       | Cit               | -1.7               |
| BI282702       | Acta2             | -2.6               | AI705040       | Cklfsf5_predicted | -5.4               |
| NM_134329      | Adh7              | 2.0                | AI576758       | Clec11a           | -2.0               |
| NM_012715      | Adm               | 1.8                | AF314657       | Clu               | 3.0                |
| AI175416       | Agpat5_predicted  | -1.6               | AF314657       | Clu               | 2.0                |
| AW522526       | Akr1cl1_predicted | 3.5                | BM389291       | Col11a1           | -1.5               |
| NM_022407      | Aldh1a1           | -2.9               | AA800298       | Col15a1           | 1.8                |
| NM_053896      | Aldh1a2           | -2.0               | AW524253       | Col23a1           | 3                  |
| NM_031972      | Aldh3a1           | 2.6                | BF392901       | Col27a1           | -2.2               |
| NM_031544      | Ampd3             | 2.0                | BF286402       | Col27a1           | -2.4               |
| L81174         | Ankrd1            | -2.5               | AF305418       | Col2a1            | -20.6              |
| NM_013220      | Ankrd1            | -2.3               | AF305418       | Col2a1            | -7.4               |
| NM_019363      | Aox1              | 2.4                | AI176126       | Col6a3_predicted  | 1.7                |
| NM_017123      | Areg              | 1.9                | BM388861       | Col9a1            | -2.5               |
| BG377201       | Arhgap24          | -2.1               | BM384121       | Col9a2_predicted  | -2.8               |
| BI275896       | Asam              | -3.2               | BM389001       | Col9a3_predicted  | -8                 |
| BI303342       | Asam              | -3.2               | NM_012812      | Cox6a2            | 2.4                |
| AF329099       | Asrgl1            | -1.7               | AF109674       | Crispld2          | -1.9               |
| M14137         | Atp1b1            | -2.7               | AA925924       | Crlf1_predicted   | -2.0               |
| AI232036       | Atp1b1            | -2.3               | AA866388       | Crlf1_predicted   | -2.0               |
| NM_053019      | Avpr1a            | 1.9                | BE114076       | Cttnbp2           | -1.8               |
| BF408665       | Bace2             | -1.8               | NM_030845      | Cxcl1             | 2.0                |
| BI279562       | Baiap2            | 1.8                | AI171777       | Cxcl12            | 3.5                |
| NM_017178      | Bmp2              | 3                  | AF189724       | Cxcl12            | 4.5                |
| NM_012827      | Bmp4              | -2                 | BF283398       | Cxcl12            | 5.1                |
| BI293047       | Bmper_predicted   | -2.6               | X00469         | Cyp1a1            | 2.4                |
| BI292425       | C1r               | 2.0                | BF397093       | Cyp26b1           | -2.8               |
| D88250         | C1s               | 2.5                | AA818353       | Dapk1_predicted   | 2.2                |
| NM_016994      | C3                | 1.9                | BM390253       | Dcn               | 3.2                |
| BI285347       | C4a               | 3.9                | NM_022297      | Ddah1             | -2.8               |
| AB030829       | Ca3               | -3                 | NM_080399      | Ddit4l            | 1.9                |
| NM_019292      | Ca3               | -2.6               | BI291018       | Dok1              | -1.8               |
| NM_031808      | Capn6             | -1.9               | AI138048       | Dscr1l1           | 3.5                |
| BM391835       | Car9_predicted    | -3.4               | BI274408       | Dscr1l1           | 4.5                |
| BM387008       | Casp3             | 1.9                | AI231350       | Dusp6             | 2.0                |
| U84410         | Casp3             | 1.9                | NM_019234      | Dync1i1           | -2                 |
| AW915173       | Cav               | -1.6               | NM_012947      | Eef2k             | 1.7                |
| BE098003       | Ccbe1_predicted   | 1.7                | BF284634       | Efemp1            | 5.6                |
| NM_031518      | Cd200             | -1.9               | NM_022955      | Egfl3             | -1.9               |
| BF417638       | Cdca3             | -1.7               | AA957585       | Ehd3              | -1.9               |
| BF402765       | Cdh10             | -3.3               | BI274506       | Eln               | -3.5               |
| BI296340       | Cdh11             | 1.7                | J04035         | Eln               | -2.7               |
| BE111632       | Cdh11             | 2.7                | AF214568       | Enpep             | 3.4                |
| U23056         | Ceacam10          | -1.8               | NM_053535      | Enpp1             | -1.8               |
| L46791         | Ces3              | 2.0                | NM_019370      | Enpp3             | 3.2                |

| <u>Gene ID</u> | <u>Name</u>      | <u>Fold change</u> | <u>Gene ID</u> | <u>Name</u>       | <u>Fold change</u> |
|----------------|------------------|--------------------|----------------|-------------------|--------------------|
| BI281250       | Cftr             | -1.9               | NM_053927      | Epb4.1i3          | -3.4               |
| BF284899       | Cidea_predicted  | 2.3                | AB032828       | Epb4.1i3          | -3.4               |
| AI715477       | Eps8l1_predicted | -2.7               | BI290037       | Jam2              | -1.8               |
| NM_133397      | Erg              | -2.4               | NM_012971      | Kcna4             | 6.5                |
| AA963276       | Etv1_predicted   | 2.5                | AI010839       | Kcnma1            | -7                 |
| AI059914       | Etv1_predicted   | 2.7                | AW142820       | Kirrel3_predicted | -2.6               |
| NM_019199      | Fgf18            | -2.4               | NM_012696      | Kng1              | 1.7                |
| BM390970       | Fgfr1            | -2.1               | BF556962       | Lama2_predicted   | 2                  |
| AF323608       | Fgl2             | 1.8                | BI274917       | Lama5             | 3.5                |
| BG663284       | Fgl2             | 3.0                | NM_130741      | Lcn2              | 2.0                |
| AI716194       | Fgl2             | 2.4                | NM_030854      | Lect1             | -3.9               |
| AI411941       | Fndc1            | -4.4               | BI275904       | Lims2             | -1.8               |
| M69056         | Fntb             | -4.1               | AI602501       | Lmcd1_predicted   | -1.7               |
| NM_012743      | Foxa2            | 1.8                | AB062135       | LOC619393         | 2.4                |
| NM_053629      | Fstl3            | -2.0               | AW528719       | LOC680712         | -1.6               |
| AW144239       | Fstl3            | -1.9               | BM388427       | LOC680866         | -1.8               |
| AI230396       | Fyn              | 1.6                | AW527186       | LOC685243         | 1.7                |
| BI287978       | Gadd45b          | -1.9               | BE103244       | LOC685611         | -1.5               |
| AI101388       | GalNAc4S6ST      | 1.9                | AI029494       | LOC685899         | 1.7                |
| NM_019216      | Gdf15            | 2.3                | BG371944       | LOC686128         | -1.8               |
| NM_017009      | Gfap             | -1.7               | BF393607       | LOC689147         | 3.4                |
| NM_021654      | Gja4             | -1.8               | BM383531       | LOC689415         | 1.8                |
| BI284411       | Glud1            | 1.7                | AA957929       | LOC689931         | -2.7               |
| NM_013145      | Gnai1            | 2.4                | BM387458       | LOC690073         | -1.7               |
| AI112577       | Gng3             | -2.1               | AI717543       | LOC691307         | 1.8                |
| NM_012774      | Gpc3             | 2.8                | BI274399       | Loxl3_predicted   | -2                 |
| NM_030831      | Gpcr12           | -1.9               | NM_012598      | Lpl               | 2.1                |
| BF394166       | Gpm6a            | 1.9                | BM383632       | Lrrc48            | -2.1               |
| NM_133298      | Gpnmb            | 2.2                | AI711152       | Lrrn6a            | -1.9               |
| BI284296       | Gpr126_predicted | -1.8               | BG375362       | Ltbp4             | -2.1               |
| NM_057201      | Gpr37            | 1.6                | BM390763       | Mall              | -4.1               |
| NM_031696      | Gpr88            | 3.5                | NM_053847      | Map3k8            | 2.1                |
| NM_031623      | Grb14            | -2.1               | AI575071       | Me2_predicted     | 1.8                |
| NM_019189      | Hapln1           | -3.9               | NM_017149      | Meox2             | 2.2                |
| BM391441       | Hapln1           | -4.5               | AI716211       | MGC105649         | 1.8                |
| NM_013153      | Has2             | -2.0               | BE111332       | MGC105733         | -1.6               |
| AW434961       | Hfe2             | 1.8                | BM391248       | MGC108778         | -3.1               |
| NM_022605      | Hpse             | 2.0                | AI408440       | MGC108823         | 2.9                |
| AF177430       | Hs3st1           | 2.5                | AI556075       | MGC112790         | -2                 |
| NM_017080      | Hsd11b1          | 2.0                | AI385260       | MGC72614          | -1.9               |
| NM_031971      | Hspa1a           | -2                 | NM_134349      | Mgst1             | 3.9                |
| NM_021863      | Hspa2            | -2                 | NM_030852      | Mia1              | -9.6               |
| BF410146       | Hspa2            | -2.1               | BG378791       | Mlana_predicted   | 2.7                |
| BE116009       | Id4              | 1.8                | NM_012608      | Mme               | -2.2               |
| AA943034       | Igsf4c_predicted | -2.9               | NM_133523      | Mmp3              | -2.9               |
| BF391914       | Il1rap           | -1.7               | NM_031055      | Mmp9              | -1.9               |
| NM_013037      | Il1rl1           | -6.6               | AW524012       | Mrap_predicted    | -2.1               |
| NM_022392      | Insig1           | 1.7                | AI408286       | Ms4a7_predicted   | -3.8               |

| <u>Gene ID</u> | <u>Name</u>       | <u>Fold change</u> | <u>Gene ID</u> | <u>Name</u>        | <u>Fold change</u> |
|----------------|-------------------|--------------------|----------------|--------------------|--------------------|
| AI229643       | Jak2              | 1.7                | AF411318       | Mt1a               | 2.4                |
| AA849471       | Jam2              | -1.6               | M24327         | Mt1a               | 2.0                |
| BG374290       | Mtap2             | -2.1               | D78610         | Ptpre              | 1.9                |
| BE113032       | Mtss1_predicted   | 1.6                | AF239157       | Rasd1              | 3.2                |
| BF408465       | Myct1_predicted   | -2.3               | BG375198       | Rasl11b            | -2                 |
| AI578120       | Myh14             | -2.3               | BI286015       | Rassf4             | -2.0               |
| BI279044       | MyI9_predicted    | -2.5               | AI227769       | Rassf4             | -1.8               |
| NM_133583      | Ndrp2             | -2.0               | BG375029       | Rassf4             | -1.9               |
| AW252250       | Nebi_predicted    | -1.9               | NM_012733      | Rbp1               | -3.8               |
| BM392374       | Nedd9             | -1.7               | AI011920       | Rcsd1_predicted    | -1.7               |
| BF555968       | Nedd9             | -1.8               | AI059694       | RGD1305459_predict | -2.7               |
| NM_017029      | Nef3              | -3.2               | BF418649       | RGD1305645_predict | -1.7               |
| NM_031522      | Neu1              | -1.9               | BG380767       | RGD1305664         | -1.8               |
| BE111846       | Neu1              | -1.8               | BM390497       | RGD1306323_predict | -3.1               |
| BM389302       | Nid2              | -3.5               | BG380826       | RGD1306327         | -2.1               |
| AA859752       | Nog               | -1.8               | BI295501       | RGD1306658         | 1.9                |
| NM_030868      | Nov               | -5.2               | BF389238       | RGD1306938_predict | 2.8                |
| X78595         | Npr3              | -1.9               | BF415061       | RGD1307034_predict | -1.7               |
| NM_031073      | Ntf3              | 2.3                | BF408325       | RGD1307569_predict | 2.2                |
| AW521702       | Odz3_predicted    | -1.7               | AA963863       | RGD1307618_predict | -4.2               |
| NM_133306      | Oldlr1            | -6.8               | AA963833       | RGD1307618_predict | -3.5               |
| AI711403       | P4ha3             | -2.5               | BM383011       | RGD1308428_predict | -2.1               |
| BI281735       | Pak1              | -1.7               | AW523875       | RGD1309051         | -1.6               |
| U23443         | Pak1              | -1.8               | AA955213       | RGD1309362         | 2.8                |
| AI176360       | Palmd             | -2                 | BM385387       | RGD1309879         | -2.2               |
| AI231808       | Palmd             | -2.3               | BM385779       | RGD1311307         | -2.0               |
| AW919178       | Palmd             | -2.2               | BE113624       | RGD1311589_predict | 1.8                |
| BM388717       | Panx3             | -1.6               | BM384131       | RGD1311939_predict | -1.6               |
| BI285321       | Papss2_predicted  | -2.9               | BF398271       | RGD1359691         | -2.2               |
| AW917486       | Papss2_predicted  | -3.3               | BG377391       | RGD1359691         | -2.1               |
| M83745         | Pcsk1             | 2.2                | BF283408       | RGD1559803_predict | 3.1                |
| AA858930       | Pde4b             | -1.8               | BE117002       | RGD1560967_predict | -1.9               |
| AB052170       | Pdgfd             | 2.1                | AI179609       | RGD1561062_predict | 1.7                |
| BM384311       | Pdgfrl            | -1.5               | AW521222       | RGD1562115_predict | -1.8               |
| NM_017139      | Penk1             | 1.9                | BF557676       | RGD1562115_predict | -1.8               |
| BG371843       | Pkp1_predicted    | -2.2               | BM390001       | RGD1562284_predict | 1.8                |
| BF289229       | Pla2r1_predicted  | -1.8               | AI408343       | RGD1562552_predict | 2.0                |
| NM_012760      | Plagl1            | -2.7               | AI172174       | RGD1562829_predict | 1.9                |
| NM_053758      | Plce1             | -2.5               | AI170076       | RGD1562829_predict | 4.4                |
| BF547014       | Plekha6_predicted | 2.0                | BE107414       | RGD1563246_predict | 1.7                |
| AF081582       | Plekha6_predicted | -3.4               | H33003         | RGD1563319_predict | -1.8               |
| BM389026       | Postn_predicted   | -2.3               | BF291123       | RGD1563437_predict | 2.7                |
| NM_013124      | Pparg             | 1.7                | AW251654       | RGD1565408_predict | -1.7               |
| M12492         | Prkar2b           | 2.0                | BF282814       | Rgl1_predicted     | 2.4                |
| J04488         | Ptgds             | -2.0               | BF544481       | Rgl1_predicted     | 2.2                |
| AI411541       | Ptger3            | 2.9                | AI706777       | Rin3_predicted     | -2.1               |
| AB048730       | Ptges             | -1.8               | NM_053338      | Rrad               | 3.4                |
| NM_017043      | Ptgs1             | 1.9                | BI288816       | Rragd_predicted    | 2.3                |

| <u>Gene ID</u> | <u>Name</u>       | <u>Fold change</u> | <u>Gene ID</u> | <u>Name</u> | <u>Fold change</u> |
|----------------|-------------------|--------------------|----------------|-------------|--------------------|
| NM_017066      | Ptn               | 2.7                | AJ243338       | RT1-Aw2     | 2.3                |
| AI104546       | Ptp4a3_predicted  | -1.6               | NM_013191      | S100b       | -1.8               |
| NM_033499      | Scrg1             | -4.9               | AI030552       | -           | 7.3                |
| NM_013026      | Sdc1              | -1.8               | BF404786       | -           | 2.3                |
| AW527486       | Sema6a_predicted  | 1.9                | BF391308       | -           | 2.5                |
| BM387083       | Sema6a_predicted  | 3.9                | BE104424       | -           | -4.6               |
| AA859389       | Sema6a_predicted  | 1.9                | AI112936       | -           | 2.2                |
| AA799627       | Sepp1             | 1.8                | AI639128       | -           | 2.6                |
| NM_021696      | Serpinb2          | 2.6                | AI408151       | -           | -2.7               |
| AW915763       | Serping1          | 3.5                | BE115264       | -           | 4.5                |
| BG378841       | Sgca_predicted    | 1.9                | BI303340       | -           | -1.8               |
| AA800626       | Sh2d4a            | -1.7               | AI236047       | -           | 2                  |
| X97445         | Slc16a7           | 2.6                | BI298010       | -           | -3.6               |
| NM_031664      | Slc28a2           | 1.9                | BI274660       | -           | 1.6                |
| NM_017217      | Slc7a3            | -2                 | AA944827       | -           | 2.7                |
| AI101171       | Slco3a1           | 1.9                | AI716693       | -           | -4.7               |
| AF239219       | Slco3a1           | 1.6                | AA859437       | -           | 2.2                |
| AW915529       | Sifn2_predicted   | 1.6                | BF548045       | -           | 2.4                |
| AI175880       | Smoc1             | -2.2               | BI292651       | -           | 2.7                |
| BG373119       | Smoc1             | -2                 | AW522471       | -           | -2.3               |
| BM389498       | Smpdl3a           | 2.0                | AI145933       | -           | -2.8               |
| AI639523       | Spna1             | -1.8               | AA866443       | -           | -1.9               |
| M88469         | Spon1             | 5.6                | BI295963       | -           | -2.7               |
| M83143         | St6gal1           | -2.1               | BF406252       | -           | 2.7                |
| NM_031549      | Tagln             | -2.9               | BF403703       | -           | 1.8                |
| BG670310       | Tgfa              | -2.1               | BI297236       | -           | 1.9                |
| NM_012671      | Tgfa              | -2.0               | AW530225       | -           | 1.9                |
| NM_013174      | Tgfb3             | -2.7               | BI295051       | -           | -1.8               |
| BG379319       | Tgfb1             | 3.8                | AA956294       | -           | 1.6                |
| AI145313       | Thy1              | -1.8               | BF560932       | -           | 2.1                |
| AW526982       | Tlr2              | 1.8                | AI502114       | -           | 2.6                |
| NM_053785      | Tm4sf4            | 1.7                | U18772         | -           | 1.6                |
| BE108949       | Tmem30b_predicted | -2.3               | BE107482       | -           | -5.8               |
| BI274101       | Tmepai_predicted  | -2                 | BI279030       | -           | -5.4               |
| AF159103       | Tnfaip6           | -3.1               | AA955251       | -           | -4.1               |
| NM_012676      | Tnnt2             | 1.7                | AI412779       | -           | -3.9               |
| NM_023970      | Trpv4             | -1.6               | BE113148       | -           | -3.5               |
| BI285665       | Ttyh3_predicted   | 1.9                | BF406608       | -           | -3.2               |
| NM_017237      | Uchl1             | -2.3               | BI282114       | -           | -3                 |
| NM_012889      | Vcam1             | 2.6                | AA945604       | -           | -2.9               |
| BI289085       | Vnn1              | 1.7                | AA943983       | -           | -2.8               |
| BI279661       | Wfdc1             | -5.7               | AI145639       | -           | -2.8               |
| NM_022631      | Wnt5a             | 2.2                | AW532634       | -           | -2.7               |
| AF228917       | Zdhhc2            | -2.2               | BM387112       | -           | -2.6               |
| BG375315       | -                 | -1.9               | BF398465       | -           | -2.6               |
| BF405113       | -                 | 2.9                | BI289110       | -           | -2.6               |
| BF419584       | -                 | 3                  | BM389611       | -           | -2.6               |
| AI502944       | -                 | 2                  | BI274989       | -           | -2.5               |

| <u>Gene ID</u> | <u>Name</u> | <u>Fold change</u> | <u>Gene ID</u> | <u>Name</u> | <u>Fold change</u> |
|----------------|-------------|--------------------|----------------|-------------|--------------------|
| BM389075       | -           | -1.9               | BF386659       | -           | -2.4               |
| AA963069       | -           | 2                  | BG669921       | -           | -2.4               |
| AI175861       | -           | -2.3               | BG664827       | -           | -2.5               |
| AW536022       | -           | -2.3               | AI171219       | -           | 1.9                |
| BI296359       | -           | -2.2               | BI281950       | -           | 1.9                |
| AI574783       | -           | -2.1               | AI408442       | -           | 2.7                |
| AI410144       | -           | -2.1               | BF402392       | -           | -2.2               |
| BF395964       | -           | 1.8                | AA858791       | -           | -3.4               |
| AW535897       | -           | 1.8                | AA891922       | -           | -2.3               |
| AI170453       | -           | 1.8                | BF281701       | -           | 1.9                |
| AI317817       | -           | 1.8                | BG671943       | -           | 1.9                |
| AA944483       | -           | 1.9                | AI102401       | -           | 3.4                |
| AW526548       | -           | 1.9                | BI303075       | -           | 2.5                |
| BM386821       | -           | 1.9                | BG666928       | -           | 1.6                |
| BI276554       | -           | 2                  | AW524891       | -           | -3.9               |
| BM383349       | -           | 2.1                | BE102375       | -           | -1.9               |
| AI412164       | -           | 2.1                | BM385137       | -           | -2.0               |
| AI555526       | -           | 2.1                | AW524543       | -           | -2.3               |
| AI013328       | -           | 2.1                | AA957424       | -           | -2.0               |
| BE120904       | -           | 2.1                | BE111121       | -           | -1.8               |
| BF386238       | -           | 2.2                | AW918480       | -           | 1.7                |
| BE108648       | -           | 2.2                | BF283694       | -           | -1.6               |
| BF289002       | -           | 2.2                | AW916067       | -           | -1.8               |
| BE109587       | -           | 2.2                | AI071649       | -           | -1.7               |
| AI170446       | -           | 2.2                | BE104952       | -           | 2.0                |
| AI043817       | -           | 2.2                | BI295140       | -           | -1.8               |
| AI103530       | -           | 2.3                | BE097091       | -           | -1.7               |
| BF562337       | -           | 2.3                | AW533021       | -           | -1.7               |
| BF397954       | -           | 2.4                | BF401102       | -           | -1.8               |
| BF394755       | -           | 2.5                | BI295810       | -           | -2.7               |
| AA892496       | -           | 2.5                | AI111767       | -           | -1.7               |
| AI170507       | -           | 2.6                | AI044318       | -           | 1.8                |
| AI169239       | -           | 2.8                | AI029975       | -           | 2.6                |
| AI704285       | -           | 2.9                | AA849479       | -           | -1.7               |
| BE120930       | -           | 2.9                | BI278180       | -           | 2.0                |
| BF403853       | -           | 2.9                | BF291041       | -           | 2.0                |
| AA900536       | -           | 2.9                | BE103875       | -           | 1.7                |
| BE103235       | -           | 3.2                | AA996869       | -           | -2.1               |
| BM387260       | -           | 3.4                | AI501087       | -           | -1.6               |
| AA819397       | -           | 5.2                | BG380261       | -           | -1.9               |
| BI287026       | -           | 5.7                | AW526343       | -           | 2.5                |
| BE102340       | -           | 6.3                | BI294158       | -           | 1.8                |
| AA851385       | -           | 2.4                | AA924444       | -           | -4.5               |
| AI233530       | -           | -5.2               | AA925441       | -           | 1.8                |
| BE108519       | -           | 2.2                | AA875124       | -           | -2.2               |
| AA925323       | -           | -1.7               | BG371790       | -           | -2.8               |
| AA850766       | -           | 1.9                | AI169118       | -           | 1.9                |
| BF398612       | -           | 1.7                | BF407452       | -           | -1.8               |

| <u>Gene ID</u> | <u>Name</u> | <u>Fold change</u> | AI010312 | - | 1.9  |
|----------------|-------------|--------------------|----------|---|------|
| AA899303       | -           | -9.3               | BG670247 | - | -1.9 |
| AW919386       | -           | 1.9                |          |   |      |
| BE115243       | -           | 1.7                |          |   |      |
| BE113113       | -           | -1.6               |          |   |      |
| AI171103       | -           | 2.3                |          |   |      |
| BF282184       | -           | -2.1               |          |   |      |
| AA923988       | -           | 2.4                |          |   |      |
| AA963158       | -           | 2.4                |          |   |      |
| BF546029       | -           | 1.7                |          |   |      |
| AI146026       | -           | -1.9               |          |   |      |
| BM388652       | -           | -1.7               |          |   |      |
| AW920883       | -           | -2.0               |          |   |      |
| BF390608       | -           | 2.1                |          |   |      |
| BF405828       | -           | 1.8                |          |   |      |
| BF391800       | -           | 1.7                |          |   |      |
| BI301147       | -           | 1.7                |          |   |      |
| AI713223       | -           | -2.2               |          |   |      |
| BF411788       | -           | 2.0                |          |   |      |
| BI290825       | -           | -1.8               |          |   |      |
| AI501537       | -           | 1.8                |          |   |      |
| AA848916       | -           | 1.6                |          |   |      |
| BI279680       | -           | -2.1               |          |   |      |
| AA944568       | -           | 1.7                |          |   |      |
| AI144892       | -           | -2.8               |          |   |      |
| BE110033       | -           | 3.7                |          |   |      |
| BG667725       | -           | -3.1               |          |   |      |
| AW528601       | -           | -2.9               |          |   |      |
| BI283881       | -           | -3.2               |          |   |      |
| BE113272       | -           | -2.2               |          |   |      |
| BE329099       | -           | -1.6               |          |   |      |
| AW526050       | -           | 1.8                |          |   |      |
| BE108638       | -           | 1.8                |          |   |      |
| BE111725       | -           | -1.6               |          |   |      |
| AI709793       | -           | -1.7               |          |   |      |
| AA946437       | -           | 1.6                |          |   |      |
| BI275815       | -           | 1.8                |          |   |      |
| AI101727       | -           | 1.8                |          |   |      |
